# Supplementary figures and images for: Phenolic Compounds of Propolis Alleviate Lipid Metabolism Disorder
Source: Hindawi journal article supplement (doi:10.1155/2021/7615830), 2021-02-20

**a**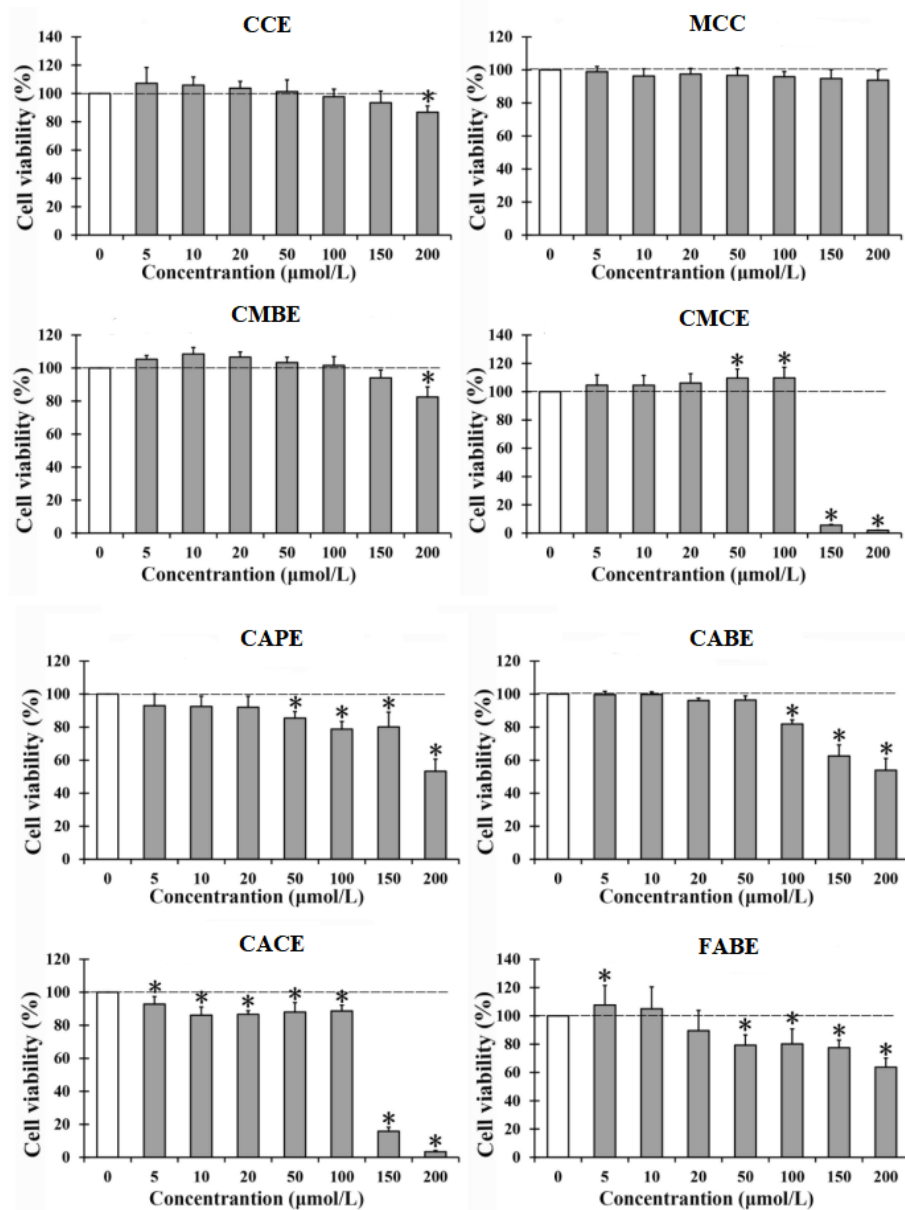**b**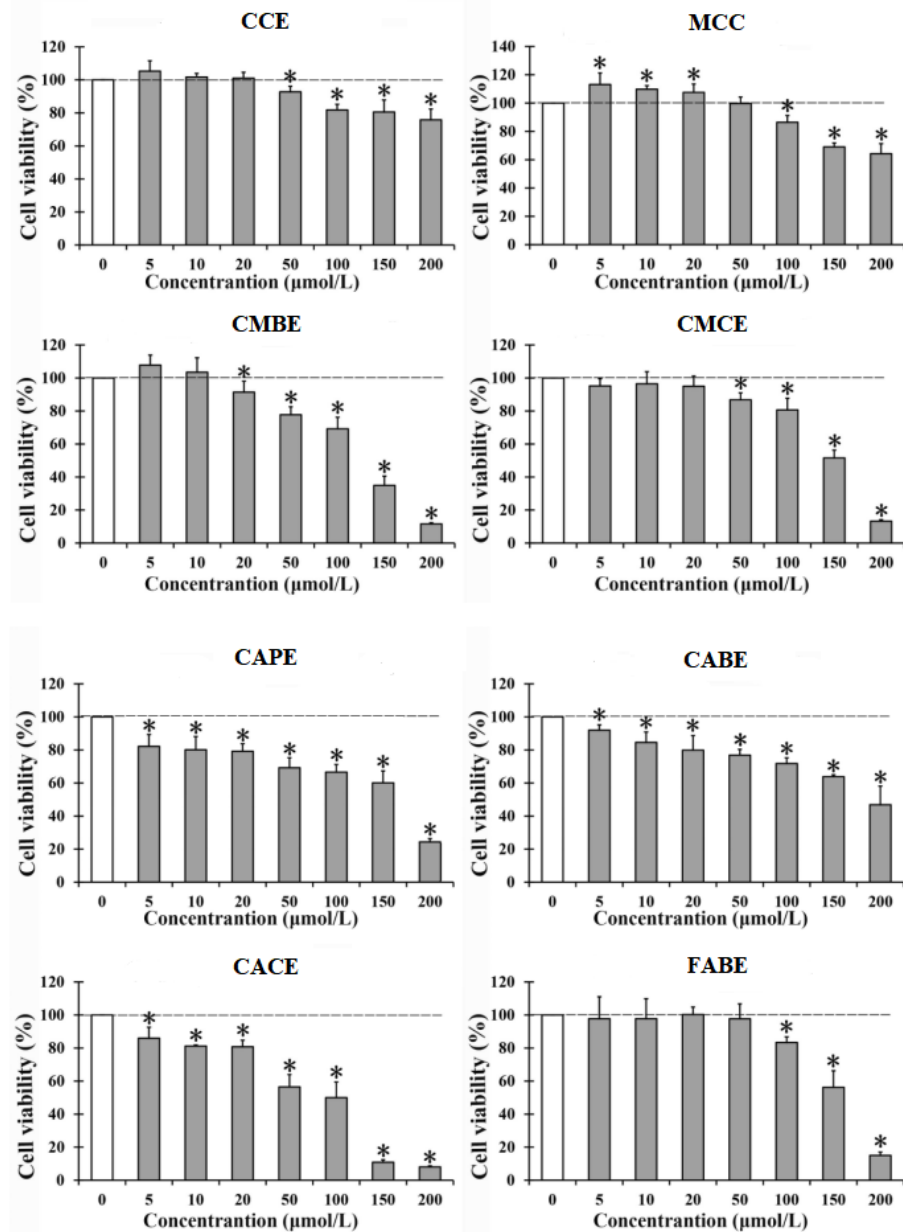

Supplement: f1 [file 7615830.f1.zip]

a

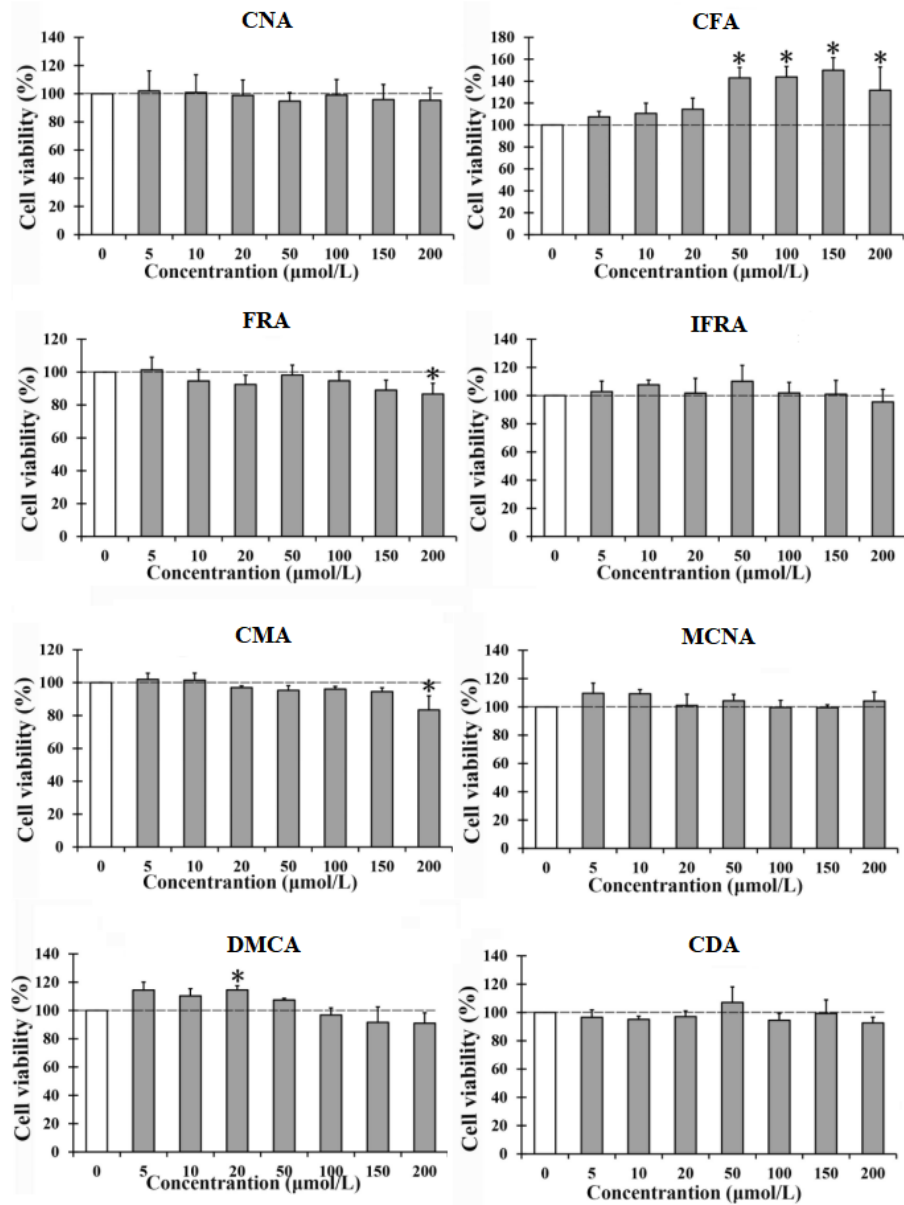

b

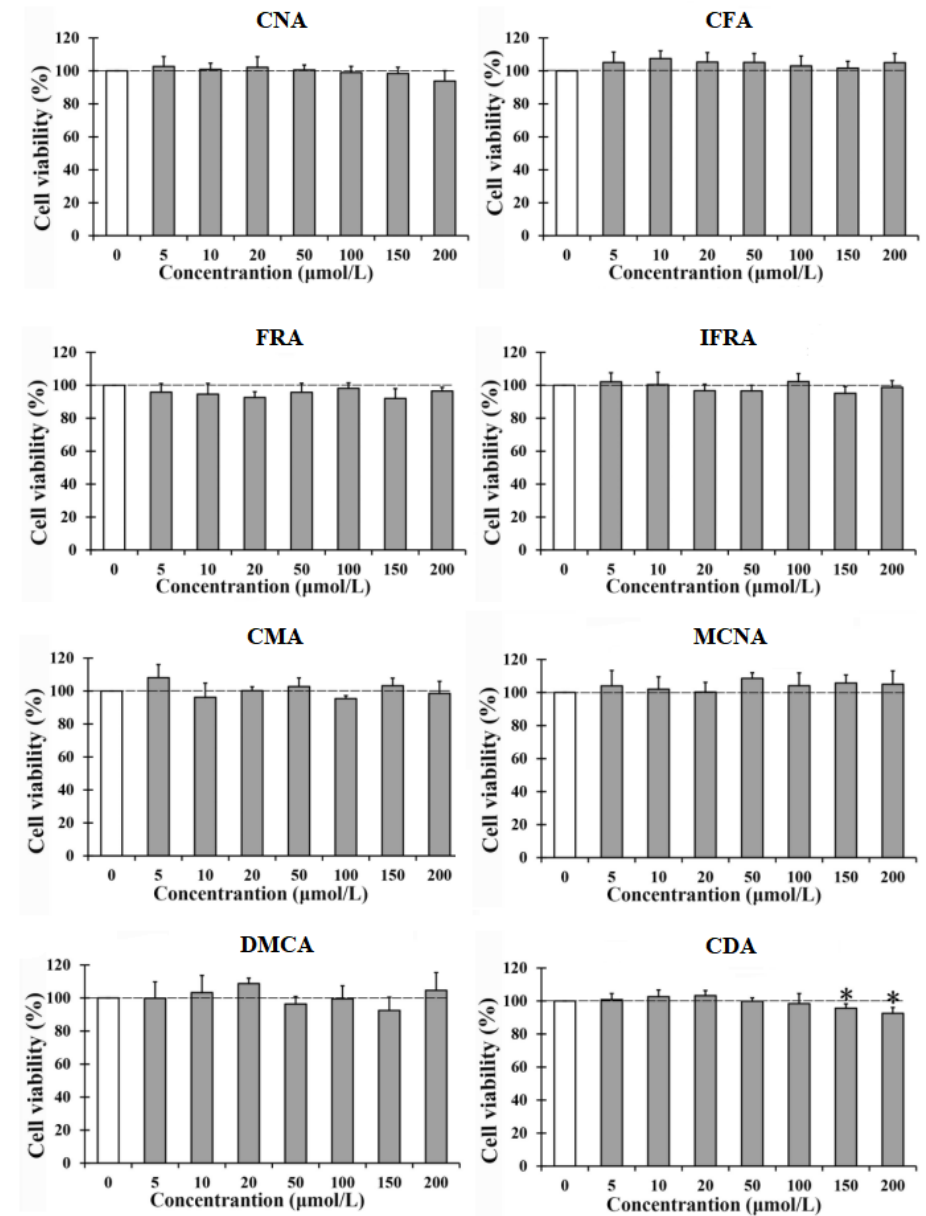

Supplement: f1 [file 7615830.f1.zip]
